# Supplementary material for: Towards a real-time modeling of global ocean waves by the fully GPU-accelerated spectral wave model WAM6-GPU
Source: Copernicus journal article supplement (doi:10.5194/egusphere-2024-169), 2024-02-22
Supplement: Supplementary file [file egusphere-2024-169-AC3-supplement.pdf]

*This is a version documentation of the WAM6-GPU.*

*version 1.0: Details about the WAM6-GPU v1.0 can be referred to <https://egusphere.copernicus.org/preprints/2024/egusphere-2024-169/>, as well as `README_WAM6-GPU_compilation_usage.pdf`.*

*Version 1.1: Include OpenACC support for nesting and single-point wave output. Now the WAM6-GPU can using executable 'ptime' to output integrated parameters at a list of output points using GPU version. Nesting cases can run on multiple GPUs. How to set up a nesting case please refer to `nestcase_readme.docx` in the root directory.*

*Version 1.2: Improvement on `SNONLIN_OPENACC` nonlinear wave interaction. an subroutine `SNONLIN_OPENACCv4` is used to further lower the time usage; Fixed some OpenACC coding bugs, especially some indexes errors, wind-swell separation, and radiation stress computation.*
